# Supplementary material
Source: publisher site journal article supplement (https://www.dovepress.com/get_supplementary_file.php?f=289707.docx)
Supplement: Supplementary file 1 [file get_supplementary_file.php]

# Supporting Information

**Table S1** List of primers used in this study

| Genes | Forward primer (5′–3′) | Reverse primer (5′–3′) |
| --- | --- | --- |
| *β-actin* | CATGGATGACGATATCGC | CATGAGGTAGTCTGTCAGG |
| *FPN* | TCCGTGAACTTGAATGTGAA | AGGCGTACCCTGTAGTGATA |
| *Hamp2* | GAAGAAAGCAGGGCAGACAT | CACAACAGATACCACAGGAGG |
| *FtH* | TGGAACTGCACAAACTGGCTACT | ATGGATTTCACCTGTTCACTCAGATAA |
| *DMT1* | TTAGCGTGGCTTATTTGACC | GACTTTCGAGATGCTTACCG |
| *IRP2* | TGAAGAAACGGACCTGCTCT | GCTCACATCCAACCACCTCT |
| *ZIP14* | TGGAGTAGAGCCAGTGGATAA | CTCGCCAGAAGACAAACAAAG |
| *SPCA1* | CCTGCGGACTTACGCTTATTT | AGGCGATGTTACTTCTTGACG |
| *SLC30A10* | GGAAGAAAGCAGCAGGAGG | ACTGCCAGTTACACGGGTCT |


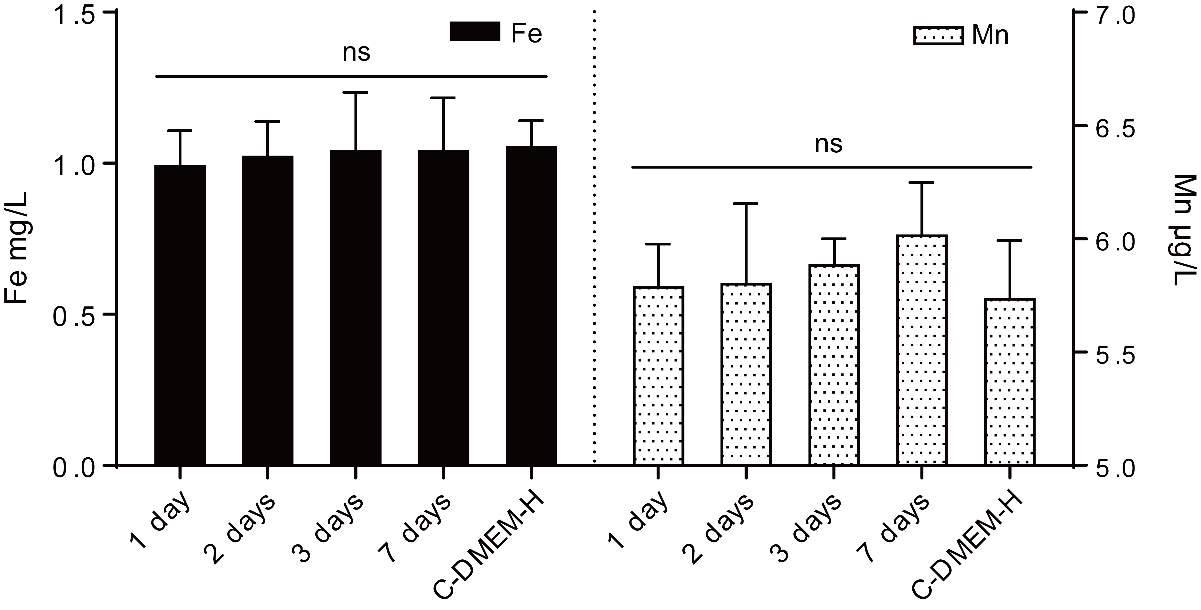


**Figure S1** The Fe and Mn ions contents of cell medium containing Mn-IONPs. The fresh C-DMEM-H media was used as negative control. ns, not significant.


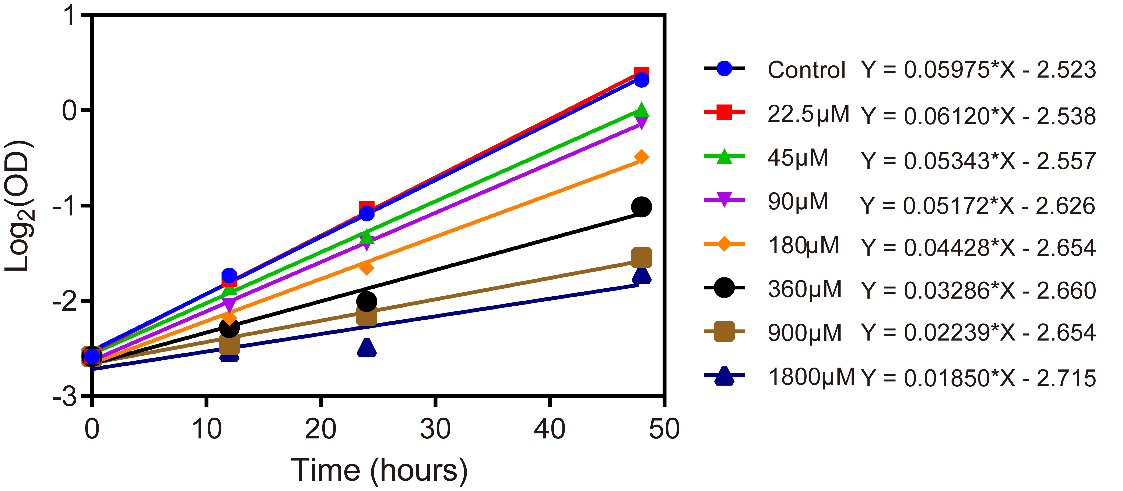


**Figure S2** Cell proliferation of RAW264.7 cells exposed to different concentrations of Mn-IONPs (Fe concentration: 0, 22.5, 45, 90, 180, 360, 900 and 1800 μM) were evaluated using the linear regression: plots of Log2(OD) vs Time. A representative of three biological repeats.


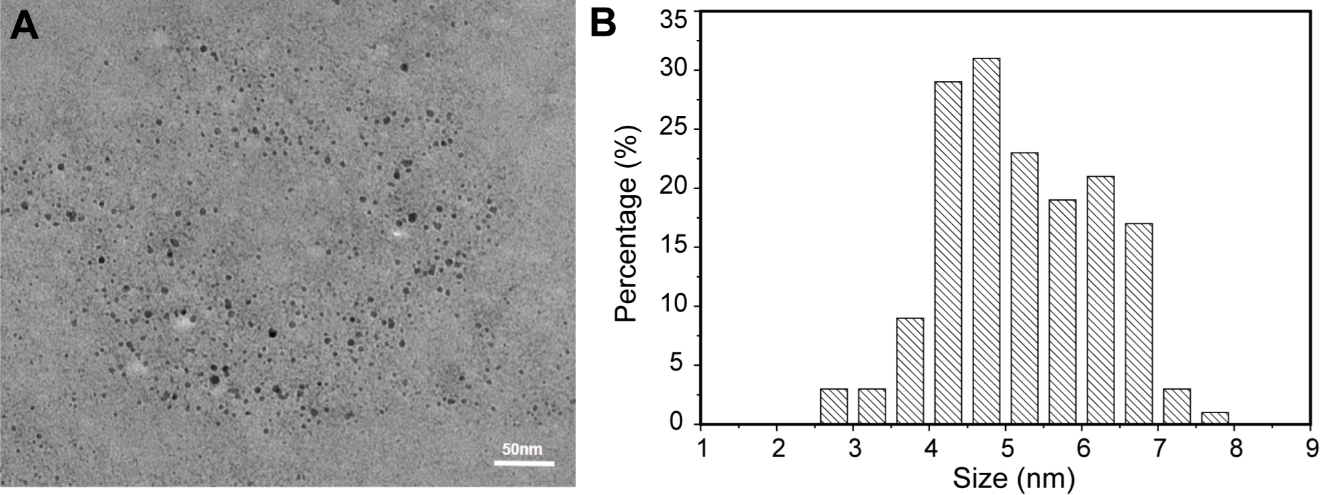


**Figure S3** TEM image (**A**) and size distribution (**B**) of the Mn-IONPs collected from the cell medium which have nourished P1 cells for 48 hours.
